# Supplementary material for: All duplicates are not equal: the difference between small-scale and genome duplication
Source: PubMed Central journal article supplement (PMC2246283; doi:10.1186/gb-2007-8-10-r209), 2007-10-04

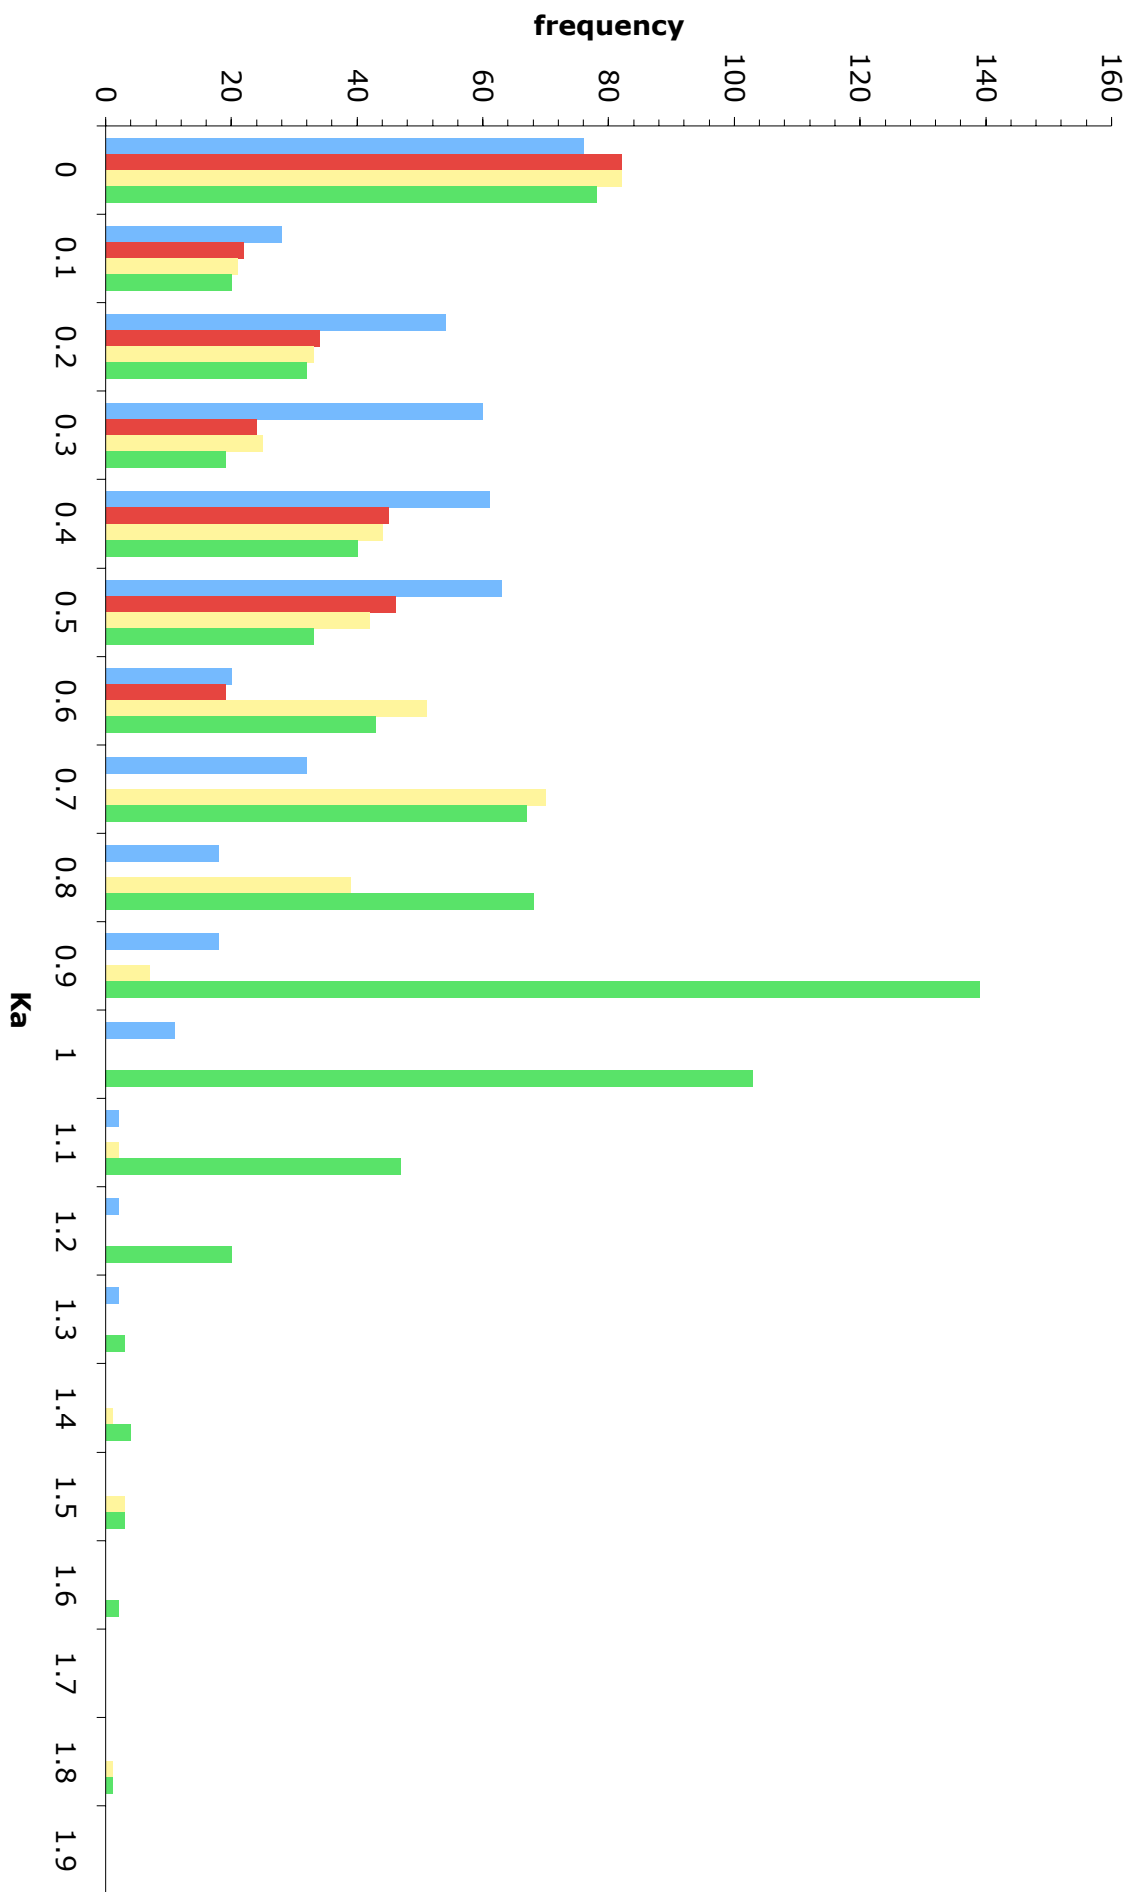

Supplement: gb-2007-8-10-r209-S3.pdf [file gb-2007-8-10-r209-S3.pdf]
